# Supplementary material for: Considering Gender Differences in Portion Sizes to Improve the Accuracy of Nutrient Intakes from A Food Frequency Questionnaire
Source: PubMed Central journal article supplement (PMC6682990; doi:10.3390/nu11071449), 2019-06-26
Supplement: nutrients-11-01449-s001.pdf [file nutrients-11-01449-s001.pdf]

**Supplementary Table S1.** Percent of participants in the lowest and the highest quintiles of intakes from the quantitative food frequency questionnaire (QFFQ) with original-portion sizes who belong to the same quintiles from the QFFQ with gender specific-portion sizes in the calibration study of the Multiethnic Cohort.

| Nutrients                      | Daily intake    |                  |                   |                  | Nutrients                            | Nutrient Density |                  |                   |                  |
|--------------------------------|-----------------|------------------|-------------------|------------------|--------------------------------------|------------------|------------------|-------------------|------------------|
|                                | Men (n = 1,141) |                  | Women (n = 1,150) |                  |                                      | Men (n = 1,141)  |                  | Women (n = 1,150) |                  |
|                                | Lowest quintile | Highest quintile | Lowest quintile   | Highest quintile |                                      | Lowest quintile  | Highest quintile | Lowest quintile   | Highest quintile |
| Energy (kcal)                  | 86.0            | 86.0             | 87.0              | 83.9             |                                      |                  |                  |                   |                  |
| Macronutrients (g/day)         |                 |                  |                   |                  | Macronutrients (% Calorie)           |                  |                  |                   |                  |
| Protein                        | 85.1            | 86.0             | 85.2              | 85.2             | Protein                              | 86.4             | 86.4             | 87.0              | 86.1             |
| Fat                            | 85.5            | 89.0             | 85.7              | 87.0             | Fat                                  | 84.2             | 87.3             | 85.7              | 87.4             |
| Saturated fat                  | 90.4            | 89.5             | 87.0              | 89.1             | Saturated fat                        | 86.4             | 89.9             | 87.8              | 91.7             |
| Carbohydrate                   | 84.2            | 80.7             | 86.1              | 84.8             | Carbohydrate                         | 89.0             | 85.5             | 87.0              | 84.8             |
| Dietary fiber                  | 89.0            | 90.4             | 84.8              | 87.8             | Dietary fiber (g/1,000 kcal)         | 89.0             | 90.8             | 90.4              | 90.0             |
| Vitamins and Minerals (mg/day) |                 |                  |                   |                  | Vitamins and Minerals (mg/1,000kcal) |                  |                  |                   |                  |
| Vitamin A (IU)                 | 92.1            | 87.3             | 87.4              | 84.3             | Vitamin A (IU)                       | 90.4             | 89.0             | 87.4              | 83.5             |
| Vitamin D (IU)                 | 91.2            | 90.4             | 93.5              | 88.3             | Vitamin D (IU)                       | 88.2             | 90.4             | 90.4              | 87.8             |
| Vitamin E                      | 87.7            | 87.7             | 84.3              | 86.1             | Vitamin E                            | 86.0             | 90.4             | 83.0              | 88.3             |
| Vitamin C                      | 91.7            | 86.4             | 90.0              | 90.9             | Vitamin C                            | 89.9             | 88.2             | 87.8              | 88.3             |
| Vitamin B <sub>6</sub>         | 87.3            | 88.6             | 87.0              | 86.5             | Vitamin B <sub>6</sub>               | 88.2             | 90.4             | 87.4              | 90.0             |
| Vitamin B <sub>12</sub> (mcg)  | 89.0            | 91.2             | 89.1              | 89.1             | Vitamin B <sub>12</sub>              | 89.5             | 9.34             | 86.1              | 89.1             |
| Calcium                        | 88.6            | 89.9             | 89.6              | 87.0             | Calcium                              | 91.7             | 90.4             | 90.9              | 90.9             |
| Phosphorous                    | 86.4            | 87.3             | 85.7              | 84.3             | Phosphorous                          | 87.3             | 89.0             | 88.3              | 90.0             |
| Magnesium                      | 88.2            | 88.6             | 87.0              | 86.1             | Magnesium                            | 89.9             | 90.8             | 87.8              | 90.4             |
| Iron                           | 86.0            | 89.0             | 87.0              | 86.5             | Iron                                 | 88.6             | 90.8             | 90.4              | 89.6             |
| Average                        | 88.0            | 88.0             | 87.3              | 86.7             | Average                              | 88.3             | 89.5             | 87.8              | 88.5             |
